# Supplementary material for: Canine Population Structure: Assessment and Impact of Intra-Breed Stratification on SNP-Based Association Studies
Source: PLoS One. 2007 Dec 19;2(12):e1324. doi: 10.1371/journal.pone.0001324 (PMC2129117; doi:10.1371/journal.pone.0001324)
Supplement: Table S1 — Percentage of SNPs with variation of allele frequencies for each breed. 1: percentage of SNP (and number in parenthesis) for which allelic frequency varies more than 10% between US and EU population. 2: difference in allelic frequency more than 20%. (0.02 MB DOC) [file pone.0001324.s001.doc]

Table S1:

Percentage of SNPs with switch from major allele to minor allele in each breed

| Breed | switch 50-505 | switch 40 to 60 and 60 to 406 |
| --- | --- | --- |
| BMD1 | 4,61% (30) | 0,9% (6) |
| FCR2 | 5,07% (33) | 0,7% (5) |
| GR3 | 12,3% (82) | 4,06% (27) |
| RW4 | 8,90% (58) | 4,14% (27) |

1: Bernese mountain dog, 2: flat-coated retriever, 3: golden retriever, 4: rottweiler, 6: Number of SNP for which there is a change from minor allele (MAF<0.5) to major allele (MAF>0.5) in percentage and in number of SNP in parenthesis, 7: change from minor allele with MAF < 0.4 to major allele with MAF > 0.6 and vice-versa in percentage and in number of SNP in parenthesis
